# Supplementary material
Source: PubMed Central journal article supplement (PMC2744139)
Supplement: NIHMS115651-supplement-1.pdf [file NIHMS115651-supplement-1.pdf]

**THE HSP82 MOLECULAR CHAPERONE CAN PROMOTE A SWITCH BETWEEN  
UNEXTENDABLE AND EXTENDABLE TELOMERE STATES**

Diane C. DeZwaan, Oyetunji A. Toogun, Frank J. Echtenkamp and Brian C. Freeman

Supplementary Figure 1

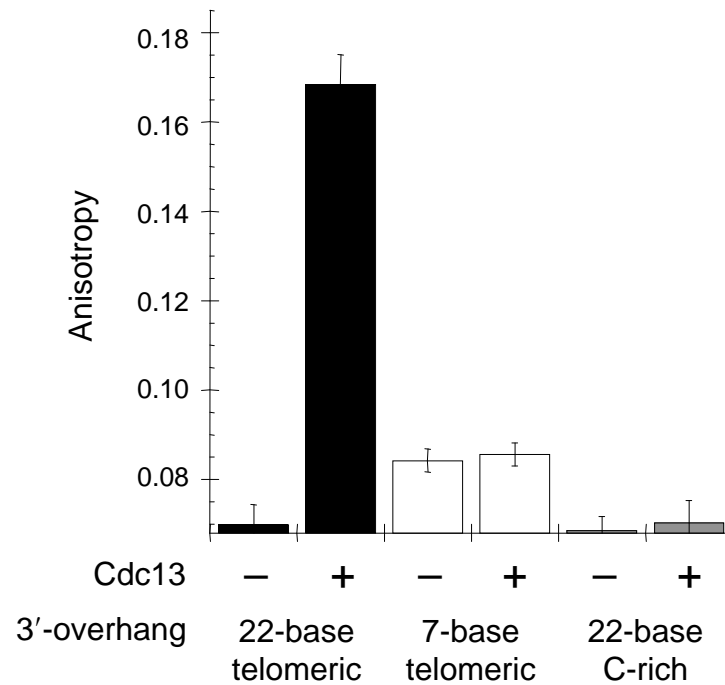

**Supplementary Figure 1.** Cdc13 displays DNA binding specificity. Fluorescence anisotropy with a fluorescein-labeled DNA substrates was used to detect DNA association. The anisotropy of the DNA oligonucleotides alone or in the presence of Cdc13 (100 nM) is shown. The 22-base and 7-base telomeric DNA substrates were prepared as described in Materials and Methods and the 22-base C-rich substrate was prepared with a fluorescein-labeled C-rich oligonucleotide (12.5 nM; fl-CACCCACACACACACCCACCCACACACACC) and a primer complimentary to the 5'-section of the fluorescein-labeled C-rich oligonucleotide (TGTGGGTG). All anisotropy data represent average values (mean +/- s.d.) from 5 independent assays.

Supplementary Figure 2

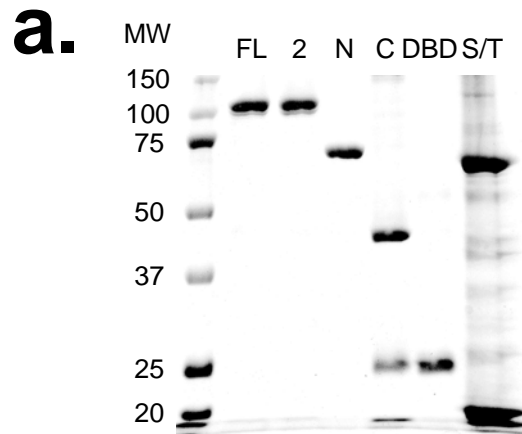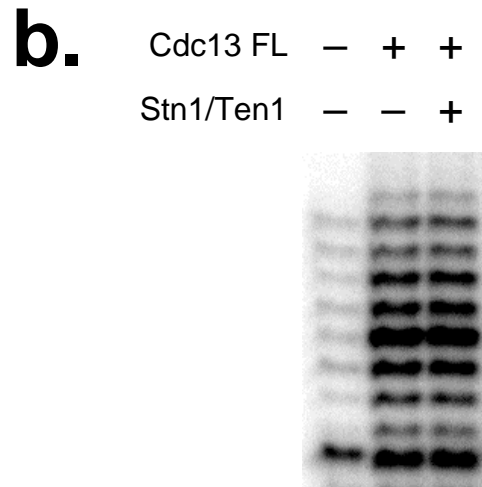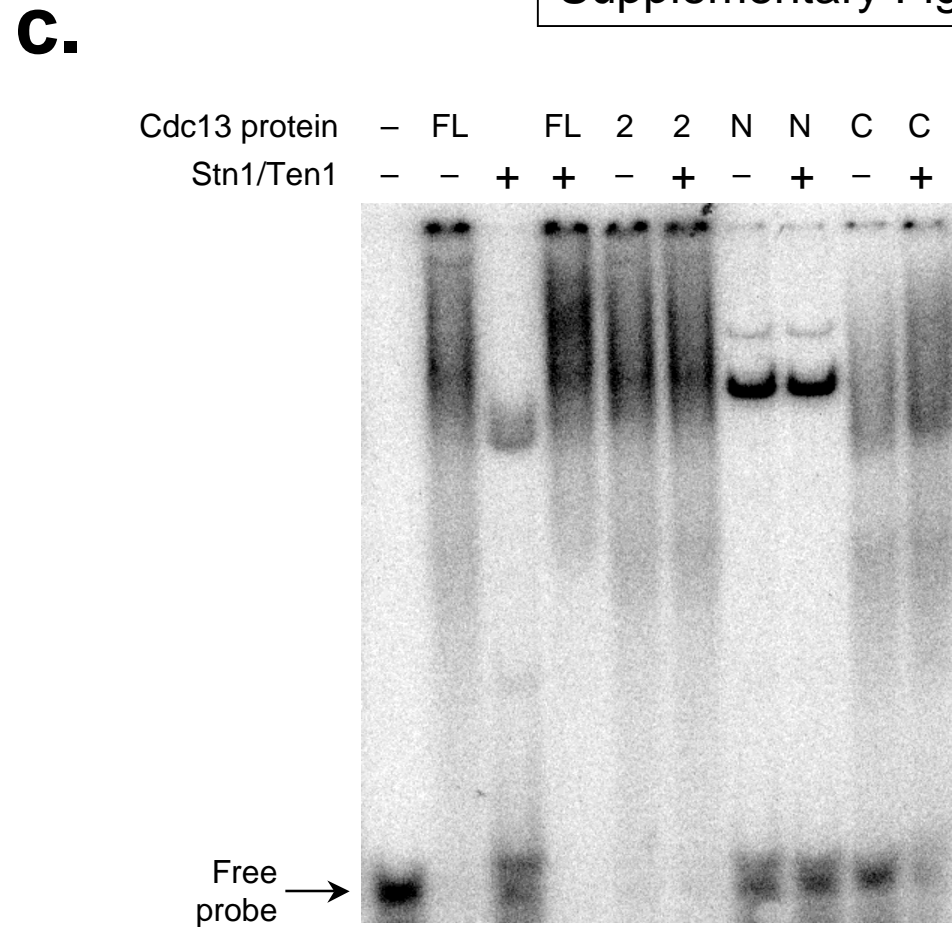

**Supplementary Figure 2.** Stn1/Ten1 does not alter the ability of Cdc13 full-length to stimulate telomerase activity using a 7-base 3'-overhang DNA substrate and the Cdc13 carboxyl-terminus harbors an Stn1/Ten1 interaction surface. **(a)** Recombinant purified (1  $\mu$ g) Cdc13 full-length (FL), Cdc13-2, amino-terminus (N), carboxyl-terminus (C) or DNA binding domain (DBD) fragments and Stn1/Ten1 (S/T) was resolved on a 12% SDS-PAGE and stained with Coomassie Blue. **(b)** Telomerase-mediated DNA extension of a 7-base 3'-overhang DNA substrate unsupplemented or supplemented with Cdc13 (250 nM) or Cdc13 and Stn1/Ten1 (250 nM). **(c)** The abilities of the Cdc13 protein derivatives (100 nM) to form a DNA-bound complex with Stn1/Ten1 (100 nM) was determined using the electro-mobility shift assay with a radio-labeled 15-base 3'-overhang telomeric oligonucleotide.

## Supplementary Figure 3

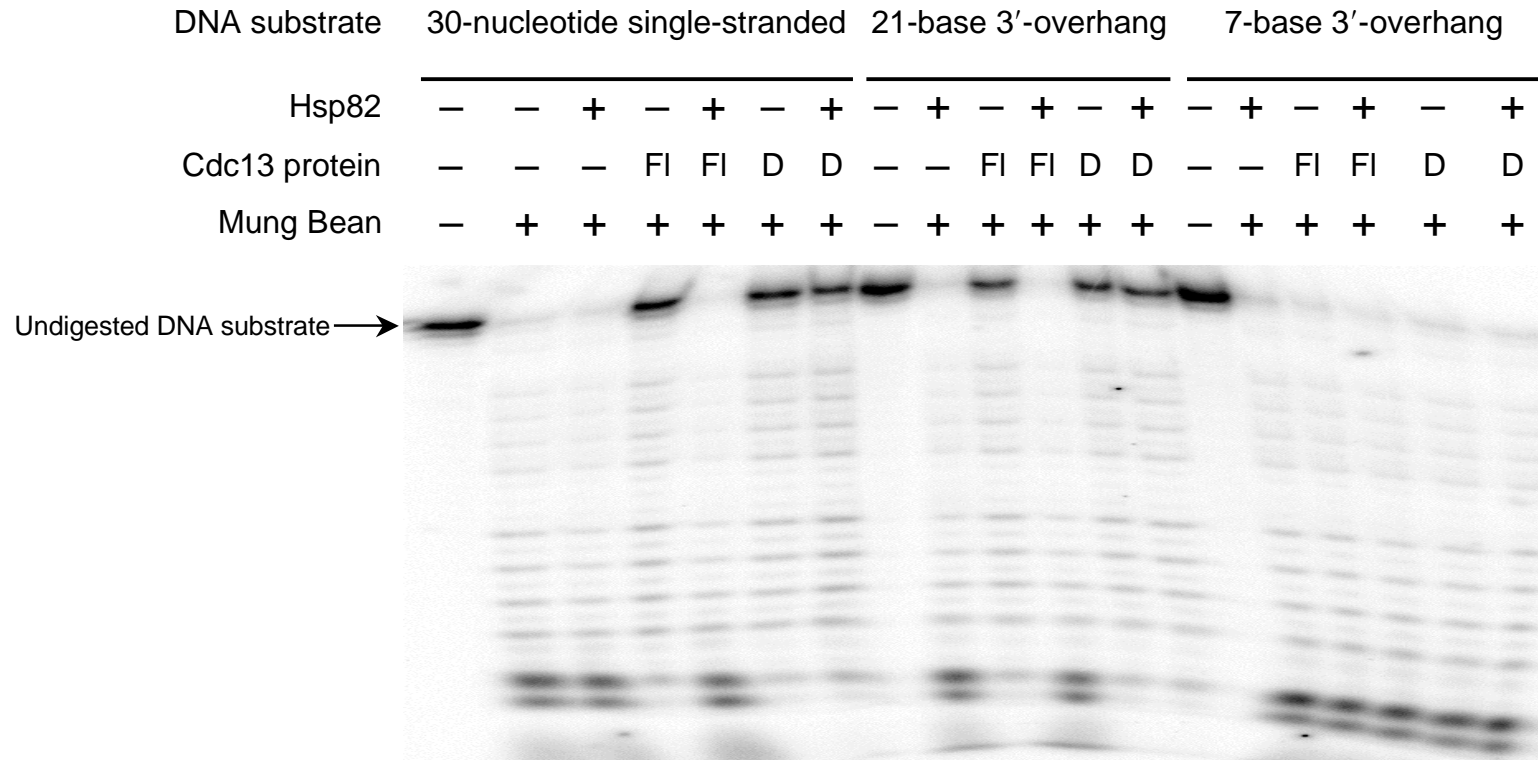

**Supplementary Figure 3.** The ability of full-length Cdc13 to protect DNA from nuclease digestion is disrupted by Hsp82 whereas the protection capacity of the DNA binding domain of Cdc13 is unaffected by Hsp82. Radio-labeled 30-nucleotide single-stranded telomeric DNA (250 pM) or hybrid single-/double-stranded DNA substrates (250 pM) with either 21- or 7-base 3'-overhangs were treated with Mung bean nuclease alone or after incubation (2 min r.t.) with full-length Cdc13 (FI) or the DNA binding domain (DBD) of Cdc13 (100 nM). All three substrates use the radio-labeled 30-nucleotide single-stranded DNA. The hybrid 3'-overhang substrates are formed with oligonucleotides complimentary to the 5' end of the 30-nucleotide single-stranded DNA (see Material and Methods). Following nuclease addition the reactions were incubated 12 min at 30°C, the reactions were stopped by the addition of formamide/NaOH loading buffer and boiling for 5 min, the samples were resolved on a 12% denaturing polyacrylamide gel, the polyacrylamide gel was dried and the products were visualized with a PhosphorImager. The 7-base 3'-overhang substrate likely displays no apparent protection by either full-length Cdc13 or the DBD since it is not bound by either Cdc13 protein derivative.

## Supplementary Figure 4

**a.**

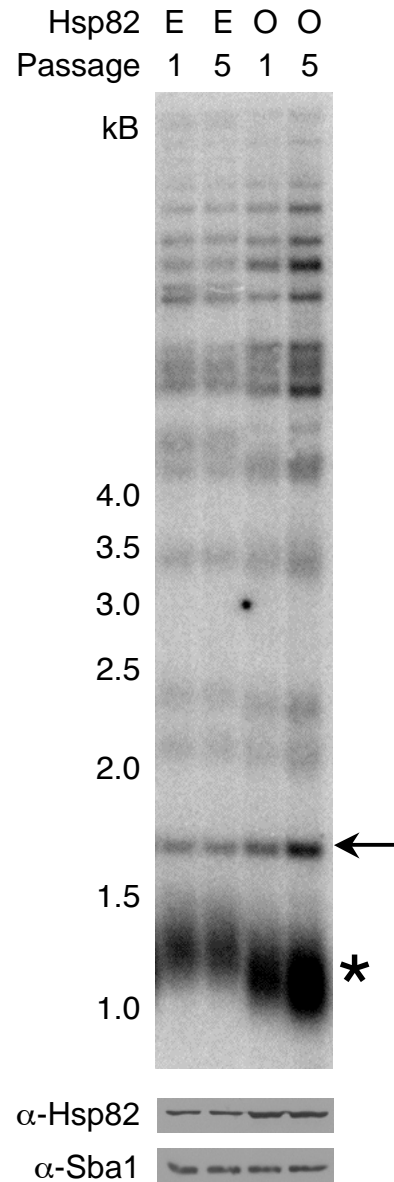

**b.**

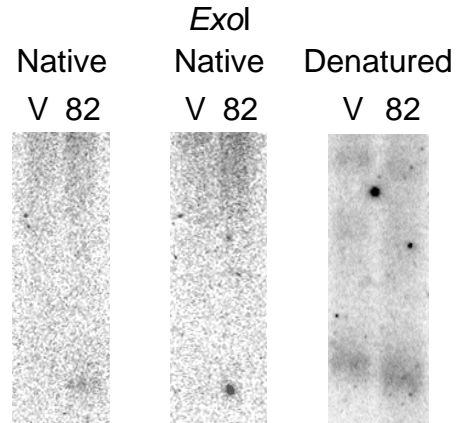

**Supplementary Figure 4.** Hsp82 overexpression reduces telomere DNA length and telomere end protection. **(a)** Genomic DNA was isolated from yeast with endogenous Hsp82 (E) or ectopically overexpressed Hsp82 (O) levels after 1 or 5 passages. Telomeric DNA (asterisk marks the position of the Y' subtelomeric fragments) and a non-telomeric, internal DNA fragment of chromosome IV (arrow) were visualized by Southern blot analysis. The endogenous (E) and ectopically overexpressed Hsp82 (O) protein levels were determined by western blot analysis, as a loading control the protein levels for the cochaperone Sba1 are shown. To achieve the ~2-fold increase in Hsp82 the heterotypic Glyceraldehyde-3-Phosphate Dehydrogenase (*GPD*) promoter was used to drive expression from a high-copy  $2\mu$  plasmid (pRS423-*GPD-HSP82*). The endogenous Hsp82 protein levels (17  $\mu$  M) and the potential feedback inhibition on the endogenous HSP82 promoter by elevated Hsp82 protein likely contribute to the relatively modest steady-state increase in Hsp82 protein. **(b)** Analysis of telomeric DNA end structure. Detection of telomeric G-strand 3'-overhangs was accomplished by a native Southern blot assay<sup>28</sup>. Genomic DNA was prepared from yeast transformants (vector (V) or pRS423-*GAL1-HSP82* (82)) that were grown at 30°C for two generations in galactose containing media. Samples were split and mock (Native) treated or digested with *Exol* (*Exol*) followed by digestion with *XhoI* and analyzed by in-gel hybridization as previously described<sup>21</sup>. Single-stranded TG<sub>1-3</sub> 3'-overhang DNA was detected using a radio-labeled telomere CA probe. The total TG<sub>1-3</sub> signal (Denatured) in the mock treated sample was detected following denaturation and reprobing of the gel.

## Supplementary Figure 5

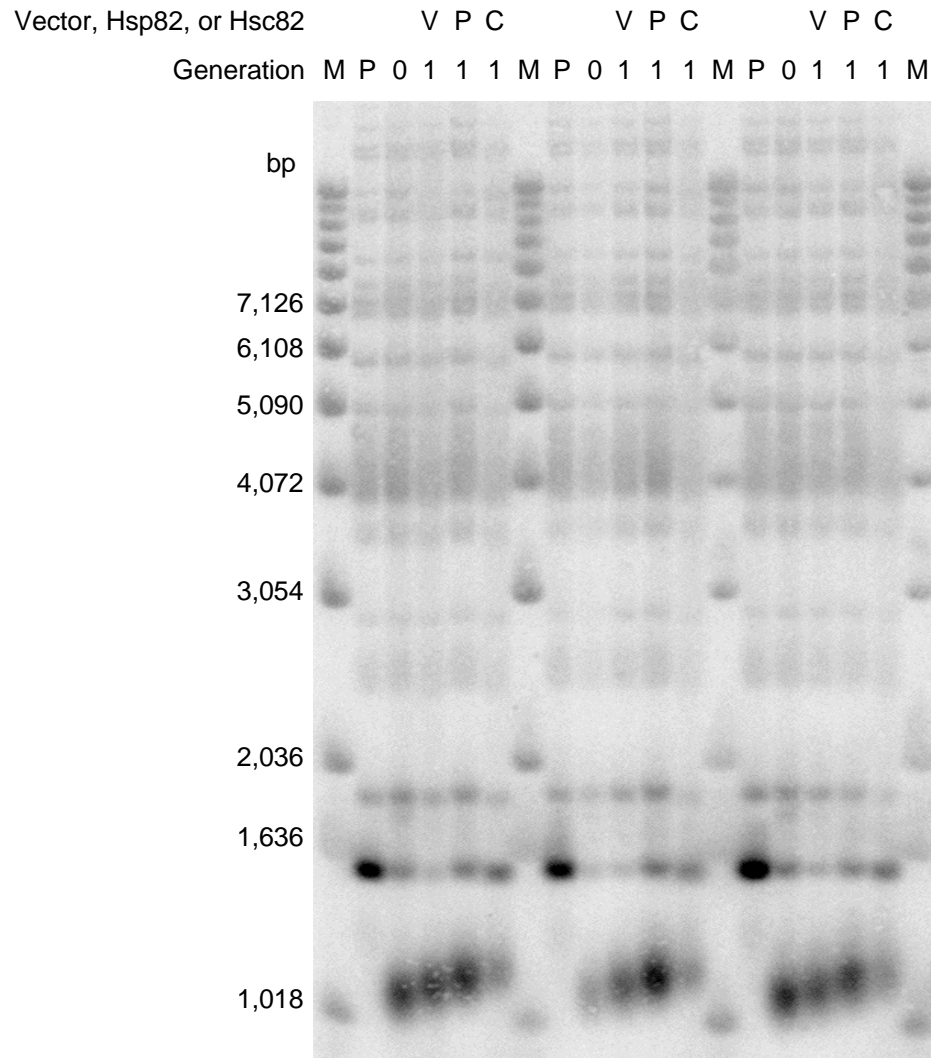

**Supplementary Figure 5.** Hsp82 overexpression increases DNA extension from an inducibly truncated telomere. Genomic DNA was isolated from yeast with endogenous Hsp82 (V) or ectopically overexpressed Hsp82 (P) or Hsc82 (C) levels after a single cell cycle. To avoid potential effects on capping activities Hsp82 or Hsc82 was expressed from the *GAL1* promoter. Wild type (LEV336) yeast transformants (pRS425-*GAL1* (V), pRS425-*GAL1-HSP82* (P) or pRS425-*GAL1-HSC82* (C)) growing exponentially in the selective raffinose (2% v/v) media were treated with  $\alpha$ -factor ( $10 \mu\text{g mL}^{-1}$ ) to synchronize the cells in G1, the media was supplemented with galactose (1% v/v final) to induce *FLP1* and chaperone expression; prior to growth in galactose an aliquot was removed for genomic DNA extraction ('preflip' or P sample). Following a 3 h incubation at  $30^\circ\text{C}$ , a sample was removed for genomic DNA extraction (0 generation), the remaining culture was clarified by a brief centrifugation, the cells were washed, resuspended in glucose containing media and allowed to double as determined by cell counting using a hemocytometer. The recovered genomic DNAs were digested with *StuI*, the products were resolved on a 25 cm 1% (w/v) agarose gel along with DNA markers (M) and the DNA was transferred to Immobilon-Ny<sup>+</sup> membrane (Millipore Inc.). The terminus of the left arm of chromosome VII (*i.e.*, extending telomere) was identified following hybridization in Ekono buffer (ISC BioExpress Inc.) using a radioactive probe produced by random prime labeling of the *HindIII-StuI* restriction fragment DNA of the sp242 vector<sup>22</sup>.
